# Supplementary material for: Experimental and Theoretical Study on Theobromine Solubility Enhancement in Binary Aqueous Solutions and Ternary Designed Solvents
Source: MDPI journal article supplement (doi:10.3390/pharmaceutics13081118), 2021-07-22
Supplement: s1 [file s1]

# Supplementary Materials: Experimental and Theoretical Study on Theobromine Solubility Enhancement in Binary Aqueous Solutions and Ternary Designed Solvents

Tomasz Jeliński, Dawid Stasiak, Tomasz Kosmalski and Piotr Cysewski

**Table S1a.** Concentrations of Theobromine solutions and the corresponding absorbance values, together with mean absorbance and standard deviation values, used during preparation of the calibration curve.

| c [mg/mL] | A <sub>mean</sub> | SD    |
|-----------|-------------------|-------|
| 0.01600   | 1.057             | 0.021 |
| 0.01280   | 0.865             | 0.018 |
| 0.01067   | 0.717             | 0.017 |
| 0.00914   | 0.629             | 0.014 |
| 0.00800   | 0.525             | 0.017 |
| 0.00711   | 0.474             | 0.023 |
| 0.00640   | 0.432             | 0.012 |
| 0.00582   | 0.391             | 0.013 |
| 0.00533   | 0.354             | 0.015 |
| 0.00492   | 0.320             | 0.017 |
| 0.00457   | 0.300             | 0.006 |
| 0.00427   | 0.289             | 0.008 |

**Table S1b.** Parameters of the obtained calibration curve for Theobromine solubility determination.

| Parameter      | Value                      |
|----------------|----------------------------|
| a              | 66.857                     |
| b              | $-1.11 \cdot 10^{-16}$     |
| R <sup>2</sup> | 0.9987                     |
| LOD            | $4.47 \cdot 10^{-4}$ mg/ml |
| LOQ            | $1.34 \cdot 10^{-3}$ mg/ml |

**Table S2.** Comparison of Theobromine solubility values at 25 °C obtained in this study and the results taken from literature.

| Solvent                    | X <sub>T</sub> [ $\cdot 10^4$ ] |         | Relative Difference |
|----------------------------|---------------------------------|---------|---------------------|
|                            | Literature                      | Results |                     |
| Water <sup>a</sup>         | 0.47                            | 0.49    | 3.29%               |
| Methanol <sup>a</sup>      | 0.43                            | 0.43    | -1.62%              |
| 1-Propanol <sup>a</sup>    | 0.21                            | 0.20    | -0.93%              |
| Ehtyl acetate <sup>a</sup> | 0.16                            | 0.16    | -2.23%              |
| Acetone <sup>a</sup>       | 0.22                            | 0.23    | 4.93%               |

<sup>a</sup> Zhong et al. [80].

**Table S3.** Mole fractions ( $10^4$ ) and standard deviation values ( $10^4$ ) of Theobromine at 25 °C in neat organic solvents and water.

| Solvent       | $x_T \cdot 10^4$ | $SD \cdot 10^4$ |
|---------------|------------------|-----------------|
| DMSO          | 8.204            | 0.043           |
| DMF           | 3.049            | 0.046           |
| 1,4.-Dioxane  | 1.650            | 0.029           |
| Acetone       | 0.234            | 0.001           |
| Acetonitrile  | 0.162            | 0.004           |
| 1-Propanol    | 0.204            | 0.002           |
| 1-Butanol     | 0.197            | 0.002           |
| 1-Pentanol    | 0.157            | 0.003           |
| Ethyl acetate | 0.155            | 0.083           |
| Water         | 0.489            | 0.007           |
| Methanol      | 0.430            | 0.011           |

**Table S4.** Mole fractions ( $10^4$ ) and standard deviation values ( $10^4$ ) of Theobromine at 25°C in binary solvents comprising water and an organic solvent in different proportions.

| $x_{\text{solvent}}$ | DMSO             |                 | DMF              |                 | 1,4-dioxane      |                 | Methanol         |                 | Acetone          |                 |
|----------------------|------------------|-----------------|------------------|-----------------|------------------|-----------------|------------------|-----------------|------------------|-----------------|
|                      | $x_T \cdot 10^4$ | $SD \cdot 10^4$ |
| 0.00                 | 0.489            | 0.007           | 0.489            | 0.007           | 0.489            | 0.007           | 0.489            | 0.007           | 0.489            | 0.007           |
| 0.03                 | 0.581            | 0.046           | 0.664            | 0.005           | 0.604            | 0.003           | 0.513            | 0.004           | 0.498            | 0.013           |
| 0.07                 | 0.716            | 0.003           | 0.837            | 0.005           | 0.807            | 0.013           | 0.525            | 0.001           | 0.507            | 0.004           |
| 0.10                 | 0.816            | 0.008           | 0.905            | 0.007           | 1.002            | 0.014           | 0.556            | 0.005           | 0.546            | 0.012           |
| 0.13                 | 0.912            | 0.009           | 1.045            | 0.002           | 1.141            | 0.015           | 0.579            | 0.004           | 0.594            | 0.008           |
| 0.17                 | 1.016            | 0.010           | 1.116            | 0.006           | 1.398            | 0.021           | 0.620            | 0.003           | 0.673            | 0.016           |
| 0.20                 | 1.194            | 0.003           | 1.263            | 0.005           | 1.609            | 0.015           | 0.683            | 0.001           | 0.738            | 0.018           |
| 0.32                 | 1.465            | 0.011           | 1.480            | 0.003           | 2.064            | 0.017           | 0.842            | 0.003           | 0.874            | 0.020           |
| 0.50                 | 1.820            | 0.134           | 1.932            | 0.012           | 2.230            | 0.009           | 0.866            | 0.021           | 0.891            | 0.029           |
| 0.68                 | 3.506            | 0.175           | 2.321            | 0.059           | 1.968            | 0.013           | 0.714            | 0.004           | 0.734            | 0.012           |
| 0.80                 | 5.131            | 0.028           | 2.621            | 0.097           | 1.808            | 0.013           | 0.590            | 0.001           | 0.514            | 0.026           |
| 1.00                 | 8.204            | 0.043           | 3.049            | 0.046           | 1.650            | 0.029           | 0.430            | 0.011           | 0.234            | 0.009           |

**Table S5.** Mole fractions ( $10^4$ ) and standard deviation values ( $10^4$ ) of Theobromine at 25 °C in pure Natural Deep Eutectic Solvents comprising choline chloride and the second constituent.

| NADES Constituent | $x_T \cdot 10^4$ | $SD \cdot 10^4$ |
|-------------------|------------------|-----------------|
| Glycerol          | 12.341           | 0.682           |
| Fructose          | 6.589            | 0.723           |
| Glucose           | 7.138            | 0.755           |
| Sorbitol          | 8.940            | 1.200           |
| Xylitol           | 8.343            | 0.938           |
| Saccharose        | 3.938            | 1.011           |
| Maltose           | 3.671            | 0.951           |

**Table S6.** Mole fractions ( $10^4$ ) and standard deviation values ( $10^4$ ) of Theobromine at 25 °C in mixture containing water and Natural Deep Eutectic Solvents in different proportions. Acronym ChCl represent Ccholine chloride.

| $x_{\text{NADES}}$ | ChCl + Glycerol  |                 | ChCl + Sorbitol  |                 | ChCl + Xylitol   |                 | ChCl+Glucose     |                 |
|--------------------|------------------|-----------------|------------------|-----------------|------------------|-----------------|------------------|-----------------|
|                    | $x_T \cdot 10^4$ | $SD \cdot 10^4$ |
| 0.00               | 0.489            | 0.007           | 0.489            | 0.007           | 0.489            | 0.007           | 0.489            | 0.007           |
| 0.03               | 0.594            | 0.002           | 0.536            | 0.004           | 0.517            | 0.001           | 0.552            | 0.001           |
| 0.07               | 0.651            | 0.002           | 0.576            | 0.002           | 0.544            | 0.005           | 0.630            | 0.010           |
| 0.10               | 0.721            | 0.004           | 0.626            | 0.002           | 0.599            | 0.005           | 0.701            | 0.003           |

|             |        |       |        |       |        |       |       |       |
|-------------|--------|-------|--------|-------|--------|-------|-------|-------|
| <b>0.13</b> | 0.830  | 0.003 | 0.698  | 0.002 | 0.659  | 0.002 | 0.806 | 0.004 |
| <b>0.17</b> | 0.990  | 0.004 | 0.788  | 0.003 | 0.742  | 0.003 | 0.942 | 0.007 |
| <b>0.20</b> | 1.218  | 0.005 | 0.945  | 0.004 | 0.871  | 0.003 | 1.217 | 0.037 |
| <b>0.32</b> | 2.257  | 0.009 | 2.077  | 0.009 | 1.725  | 0.008 | 2.082 | 0.012 |
| <b>0.50</b> | 5.111  | 0.021 | 5.459  | 0.023 | 4.867  | 0.023 | 4.542 | 0.045 |
| <b>0.68</b> | 12.834 | 0.191 | 9.755  | 0.037 | 8.818  | 0.093 | 8.211 | 0.040 |
| <b>0.80</b> | 15.594 | 0.170 | 10.960 | 0.033 | 10.026 | 0.053 | 9.216 | 0.085 |
| <b>1.00</b> | 12.341 | 0.212 | 8.940  | 0.116 | 8.435  | 0.135 | 7.263 | 0.072 |

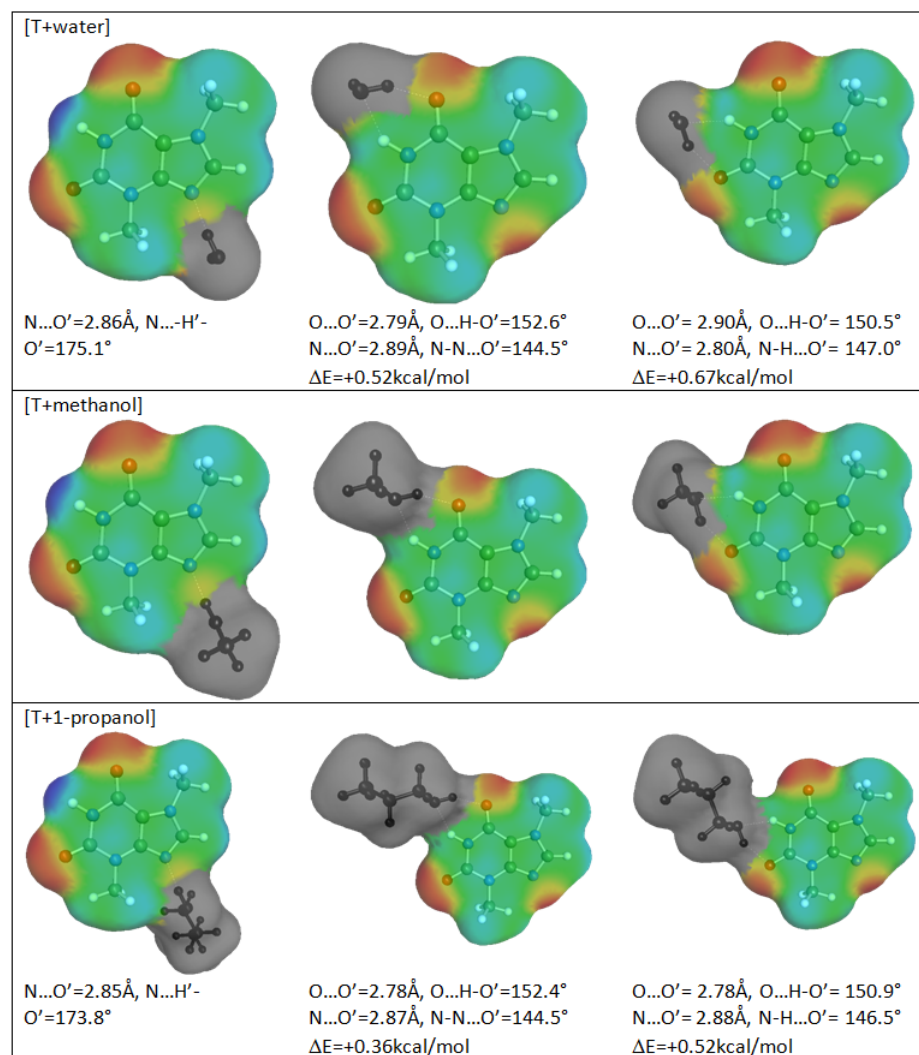

**Figure S1.** The electron distribution of the complexes of Theobromine with water and alcohols (part 1).

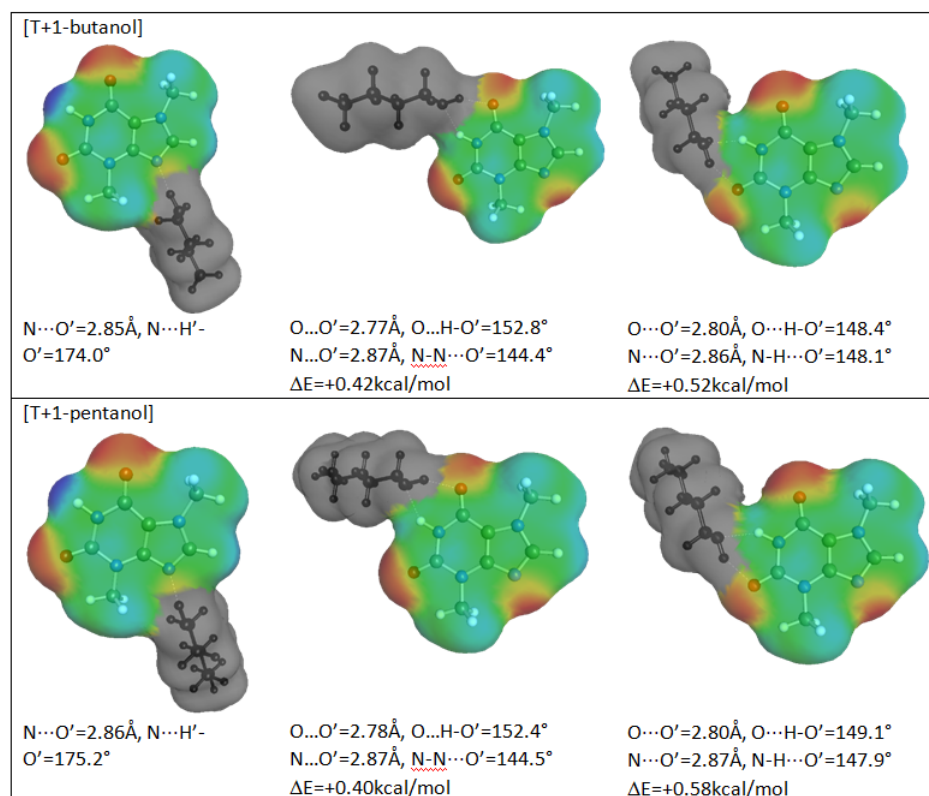

**Figure S2.** The electron distribution of the complexes of Theobromine with alcohols (part 2).

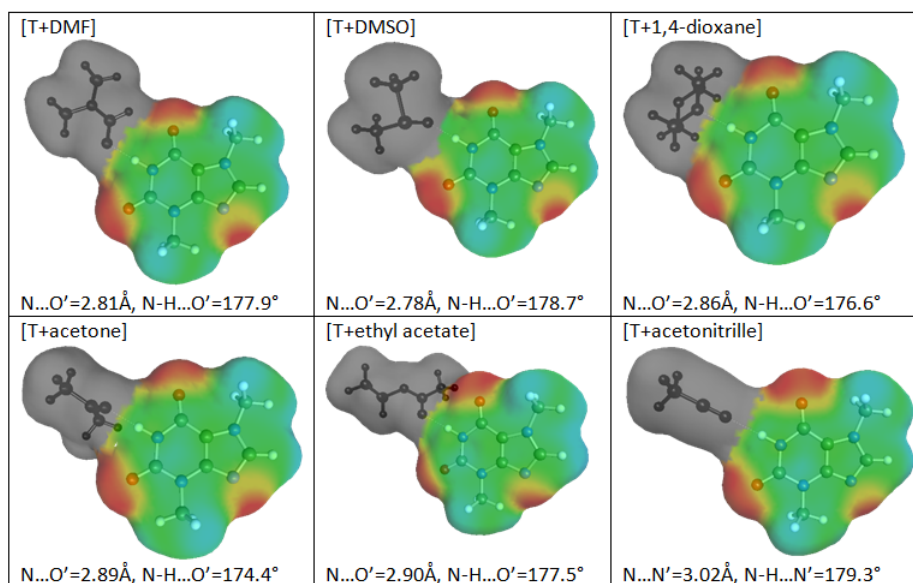

**Figure S3.** The electron distribution of the complexes of Theobromine with organic solvents.

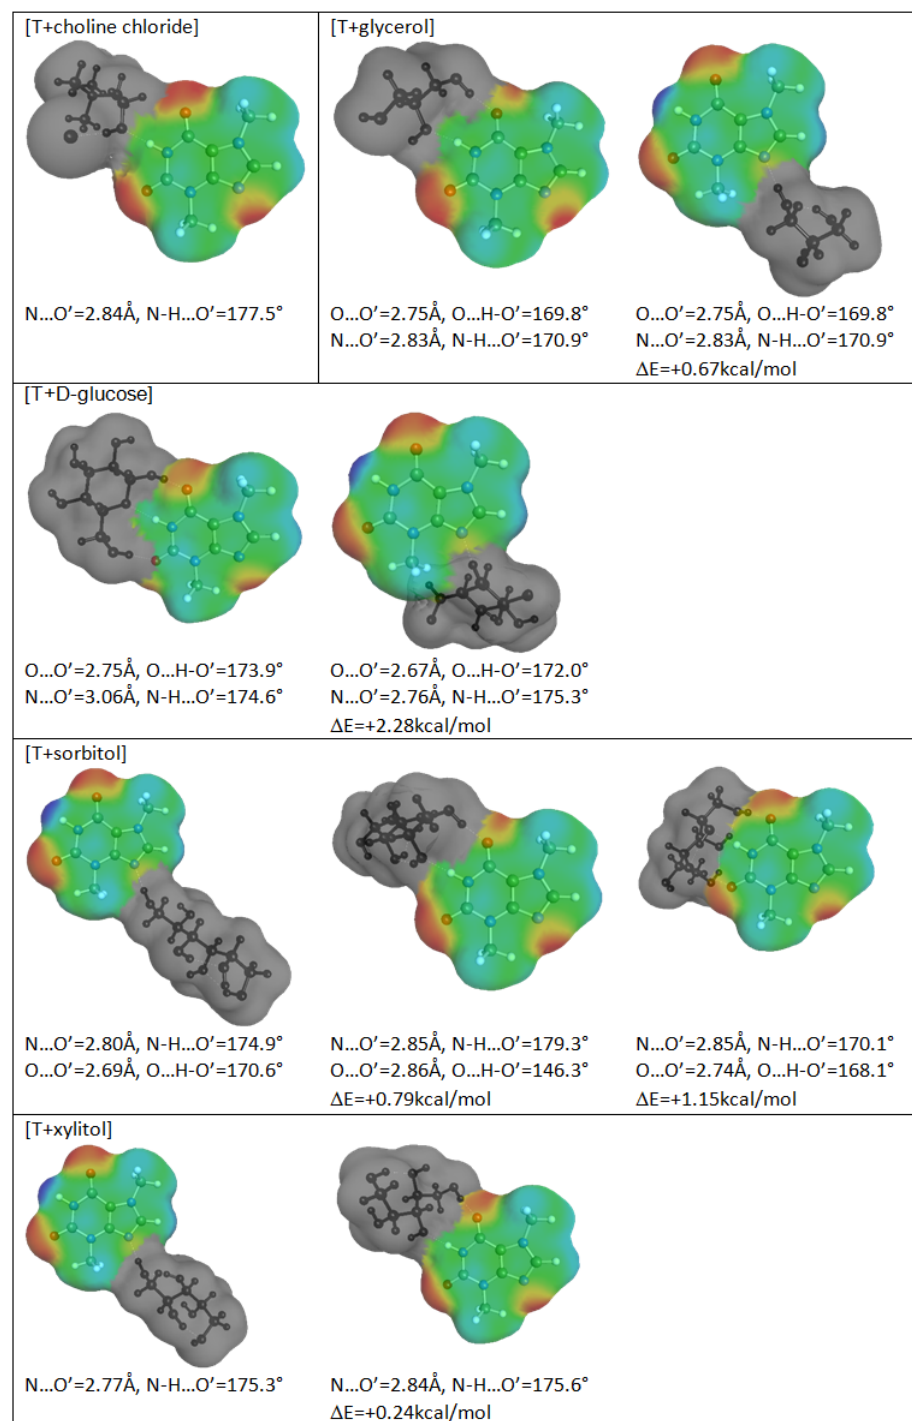

**Figure S4.** The electron distribution of the complexes of Theobromine with NADES constituents.
